# Supplementary material
Source: publisher figshare collection journal article supplement (https://gsajournals.figshare.com/articles/dataset/_/12728543)
Supplement: Supplementary file 1 [file 1]

## Supplementary materials for

### Extensive recombination suppression and epistatic selection causes chromosome-wide differentiation of a selfish sex chromosome in *Drosophila pseudoobscura*

Zachary L. Fuller<sup>1, 2\*</sup>, Spencer A. Koury<sup>3\*</sup>, Christopher J. Leonard<sup>3</sup>, Randee E. Young<sup>3, 4</sup>, Kobe Ikegami<sup>3</sup>, Jonathan Westlake<sup>1</sup>, Stephen Richards<sup>5</sup>, Stephen W. Schaeffer<sup>1</sup>, & Nitin Phadnis<sup>3\*\*</sup>

<sup>1</sup> Department of Biology, The Pennsylvania State University, University Park, PA 16802.

<sup>2</sup> Department of Biological Sciences, Columbia University, New York, NY 1002.

<sup>3</sup> School of Biological Sciences, University of Utah, Salt Lake City, UT 84112.

<sup>4</sup> Current address: Department of Genetics, University of Wisconsin, Madison, WI 53706.

<sup>5</sup> Human Genome Sequencing Center, Baylor College of Medicine, 1 Baylor Plaza, Houston, TX, 77030.

\* These authors contributed equally.

\*\* address correspondence to:

Nitin Phadnis, 257 South 1400 East, School of Biological Sciences, University of Utah, Salt Lake City, UT 84112; tel: (801)585-0493 email: [nitin.phadnis@utah.edu](mailto:nitin.phadnis@utah.edu)

## Supplementary text: Sequences at the breakpoints of the basal and medial inversions

### 1. Basal inversion, proximal breakpoint

XR\_group6:1747336-1747636-BREAKPOINT-XR\_group6:4381020-4380840

GCACGTCACMCAATACAAACACACAAGCAGTTATTCGACTAACAAATCACTTTCTTTTCACA  
TTTCACTTGTGCTTGGCTGTACATTGATTACATGGGTATTTTGTGCTCAAAACTTGTATTT  
ATTTCTTTATATAGTATACATTACAGTGGTTCAAGTGCATATTTTTTTTGTGTGCGAATATTTT  
ATTTGCAAAAAAGTAGAGATGGAGAAACGTCGATTTTACTATCGATAAATACTCAGCCGGCT  
GGTAGCGATGTCTATCGATCCTACGCTGCCAGATCGAGAGAAAAACGGTTACCTATATCTTA  
ACCATCTGTATGGTTAGAAACAAGACAAGACAAGGCCAAACTTTCCCATCTCTAAGAAAGTA  
TAATATGATATTTACAAATTCTTTGAAAAAGATAACTTCAGTGCGTACCAAACACTAATTGAC  
TTGATTGACGAAATTGATGTAAACTATAACCGGTACTCCAACACCTTAAAAAAGCGGGC  
GGTCAAGTAATCCCACGCTACTCAATGGTAGCATGGTAACTTAAGCCCTC

### 2. Basal inversion, distal breakpoint

XR\_group6:1747856-1747736-BREAKPOINT-XR\_group6: 4381024-4381264

ATAGGGATGTTAAGTATTCATTGATATCAATTATATGTATATGTTTTGCATATCATCATCGAT  
ATTTTTGTGCGATAAATATTATTTTCGATTGAAATTGTAAATACCTAATGATGTATTTCAATTAT  
TTTCGCGGTATATTCTGCTGATTTTTTGTATTTTAAGGCACTAGCACCACTAACCATATCCA  
GTGGGATATATACTGTATATATATATATACCATACAGTATACTGTATGGTTAGTGGTGGTAC  
AATGGCGCTATCGATACTATCGCATGCATCACCTATGTTACTAGGAACTACATACATTTTTT  
CGAGTGTGTGCCTATCAAATGCGTTACCGTCTGTTGATTCTTTAATCTTTAAGTTTAGTTTTA  
TTTGGGAAGCACGGTTTGTACGATGTTGAGCGCAAAAGCGAGAGAAAACCTCCATCGAAT  
GACTCTCCCGCGTTATGTAATTAACGCATTGTTCAAGTTGCTCCTCACTCAACTGG

Repetitive motif at breakpoint: CCATACAGTATACTGTATGGTTAGTGG

### 3. Medial inversion, proximal breakpoint

XR\_group6: 5055855-5056104-BREAKPOINT-XR\_group8: 706130-705579

ATTACCGGAGAATATTTAAATTTAATACGTTCCAGCGATAAATATACCGATTTCGAGTAATAG  
CGAGTTGGATAAAATAATAACACAATTAGAAATGTGTATATCTATGTGTTTTTTTATTTAAG  
CCTATTTTTTTGGCCTTTTTCAATTTTTAGCTTGTTTTAGCTTGTTTTGTGAAATCTAGCTT  
ATTTTTACGCTCAAAATCTGGCAACACTGCTGCAGTAGTGACCGCGGATTTATCGATAACG  
ACCATCAGGAATATACTGAAACATACCATCTCATTTTAAAAATATACCGTAAATATACTGACG  
AATTCAAGTTCTATTTTACTTATTTCTCGTTTTTGATATTTTCGTCGAATATTACCAGCTATATA  
GAACATTTAGCCATGCCCACTCAATTTTGTACGATTGATGAATCAATTCTATACATGATTGG  
CCTATTCGAAATACTTGCTTTTATTGGATTTTGGCTAAAACAAGGCATAAACAAAATAGTTCA  
ACAAAAAGAAACAGTGTTAAGATAGCAAGGTGTATTAATATAAGGTAACGTGTACAAGGTGA  
ACAGTGTGTGCACTCCAATGGTTATCCTTTTTTAGAGGATTATCGATTTTCGATAAAAACCTT  
TACTGGTCTTTTTTCGAACTCAAATCAAATTTTAAATATATAAATTGCTAGTTAACTTTAAATTGT  
TGAACTTTATTTCTGTAGCTTACAATATACATAATTCAAAATGTTTTAGGCCACACATACGAA  
TGAAATGTGGGAAAATTGGTTTTACATGAATAGAATTCACCATTTTATAAATTCTTACAATTT  
TCGTGTTTTCTTTTTGTTTTTCTTCACTTAACCTTAACTGGAACCGAGAGCGAAAGTAGAA  
AAACATTCAATTTCTTAAACAGTAGCGATTTTTGTTGTAGTTAAATATTTCGTGTATGTCCCG  
CCTAGGAATTCTTCCGATATTATACTTTTTGAGAGAGATTTAGATCAAATAGTAGACATACA  
GATACATATACATATACATATATTTTCATATATGTATGTGTATATA

Repetitive motif at breakpoint:

TCAGAAATATACCGAAATATACCATCTCATTTAAAAAATATACCGTAAATATACTGACGAATT  
CAAGTTCTCTTTTACATATTCCTCGTTTTTGATCTTCCGTGGAATATTCTCAGCTATATAGAA  
CATTTAGCCATGCCCACTCAATTTTGTACGATTGATGAATCAATTCTATACATGATTGGCCT  
ATTCGAAATACTTGCATTTATTGGATTT

XR\_group6: 5058390-5057728,5057645-5056460-BREAKPOINT-XR\_group8: 706177-708097

TTGTTGTAATAATAATAATATTGGTGGGAGCCCTTTTGGGTTTCGGCATTTCGATTCGCATACCCCAATA  
ACCATAGCCATAAACCATACTATATCTTATGGCTGCCATTAAGTTTCATTATTTCTGAATTTGT  
TTATCCGTACAGGACATCAATCAGACACGCCTGCCCTCATTCCCGAGTATGCCGTGCAGA  
CGCTTACGCCGCAGGAAATGCTTCAGGTGGAGCAGCGAATGGATCAGCGGAGGGAGCGA  
CTGAAGGACAAGTGCTCGGCCTATGGCCTGGATGTGTTAGGTGGGTCAATGGGCCACAGC  
CACAGAGAGAGATAGATAAAATAAATAGAGAGAGAAAGAGAGGAAGAGTGAGAGTGTGAAA  
ACGAACTTCTCCTTCACATCAATCTTATTTACAGGTACGACTCGTGGCACACCCCAAACAC  
ATGGGAGTTTTTTGGTCAACAAAAGATATCACATTATATGGTGCCTATACAAATTACACATCA  
CATCACATTCACAGGAACTCCTCCACTAAAGCCACGAATCTTGCGTAGGTGCAATGTGTTT  
AAGGCTGCCTCCTCATCGTGGATGTTCAACTTCAATGTTCTGGCCGGTTACTCACCCAGTT  
ATTTGCGCAAAACCAAAAAGATTCTCCTGAATCTGGCCAGAGAACGCTATCCGAGAGTGAC  
CCTTGACGAGGTGA GTGCGGAAATGGAACGGAACTAGCATCATACATTTTTTATACCCGA  
TACTCAAATGAGTATTGGGGTATATAAGATTTGTGGTAAAAGTGGATGTGTGTAACGTCCA  
GAAGGAATCGTTTCCGACCCCATAAAGTATATATATTCTTGATCAGCATCAATAGCCGAGTC  
GATAGAGCCCTGTCTGTCTGTCCGTCCGTCCCCTTACC GCCTAGTGCTCAAAGACTATAA  
GAGCTAGAGCAACGATGTTTTGGATCCAGACTTCTGTGATATGTCAGTGTACAAAAATATT  
TCAAAGAGCAACCAAATTTGGTATCCACACTCCTAATATATCGGACCGAGACGAGTTTGT  
CAAAATTTGCGCACACCCCTTCCGCCCCCGCAAAGGATGCAAATCTGGGGATATTCACAA  
ATCTCAGGGACTATTAAGGCTAGAGTAACCAAATTTGGTATCCGCACTTCTGCTAGATCTCA  
CTATAAACGTATATCTCAAATTTGCCCCACCCCTTCCGCCCCCAAAAGGACGAAAA  
CCTGTTGCATCCACAATATTGCACATTCGAGAAAACTAAAAACGCAGAATCATAGATAATGA  
CCATATCCATCAGATTGCTGAATCTGGATCACATCAGACAATTTTTATAGCCAAAAGGAACA  
AATCAATTTGCACTGGCTACGCAGCGCCCGACGTCACGCTCAGACTGATTTTCTGTCTCTC  
TCGCACGCACTCTTTGTCTGTCTGTTTAATATTAGTGGCGTCTGCCGGAGGAGAGCCATAC  
TGACTTAGTATCGGGTATAACTGTAGAGTTGCGGTGTCCGCTCATAACTCATAACGTTCCC  
CCTCGTTTTTATACCCGATACTCAAATGAGTATTGGGGTATATTAGATTTGTGGTAAAAGT  
GGATGTGTCTAACGTCCAGAAGGAATCGTTTCCGACCCCATAAAGTATATATATTCTTGATC  
AGCATCAATAGCCGAGTCGATTGAGCCCTGTCTGTCTGTCCGTCTGTCCGTCCGTCCGTCT  
GTCCGTCTGTCCGTCCCCTTCAGCGCCTAATGCTCAAAGACTATAGAGCTAGAGCAACGAT  
GTTTTTGGATCCAGACTTCTGTGATATGTCAGTGTCTGAAANATATTTCAAACTTTGCCCGC  
CCACTCCGTCCCCCAAAAGGGCGAATCTGTGCATCCACATTCGACAATACGAGAAAACT  
AAAAAACGCAGAATCGTAGAAGATGACTATATCTTACAGAGTGCAAAATCTGAACCAGATC  
GTATAATTATTACAGCCAGAATCACGAAAACAATTTCACTCTTTCTCGCTCTGTCTCACTCTA  
ACACACAGGTTTCATGGTTCGTTTTTGCCAATTTCAAATATGAGTTCAAGGATCTCAGAACC  
TATAAAAGCCAGAGCAACCAAATTTGGTATCCACACTCCTGTGATATCGGACCTTGACCGT  
TTCATGTCCACATTTGCGCACATCCCCTTCCGCCCCCGCAAAGGACGAAAAATCTGAGGCAA  
CCACAAATCTCAGAGACTATTAAGGCTAGAGTAACCAAATTTGGTACACACACTCCTTTAAG  
ATGTCACTATAAAACGTATATCTCAGAATTTGCCCCACCCCATCCGCCCCCAAAAGGA  
CGAAAATCTGTTGCATCCACAATATTGCAGATTTGAGAAAACTAAAAACGCAGAATCATAGA  
TAATGACCATATCTATTAGATTGCTGAATCTGGATCAGATCAGATAATTTTTGTAGCCAAAA  
GGAACAAATCAATTTGCATTGGCTACGCAGCGCCCGACGTCACGCTCAGACTGATTTTCTG  
TCTCTCTCGCACGCACTCTTTGTCTGTCTGTTTAATATTAGCGGCCTCTGCCGGAGGAGAG  
CCATACTGACTTAGTATCGGGTATAACCGTAGAGTTGCGGTGTCCGCAGCAACTCACACG  
TTCCCCCTCGTTTTATG TATCTCGTATGACATTTTTGCTTTTCGTTTGCAGCTGCGCGAGGC  
GCAGAATGACTCGCTAACCTTTATCATTGCACGCAATCCCTTTGAGAGGCTGTTGAGCGCT  
TATCGCGATAAGATGGTGTTCGCCCTGCCCTATTCTTCCATGACAAGCTGGGCCGCGCAGC  
ATTGTGCGCAATTATCGCAAGAAGGTAAGAAGGCAATCAAGACTGACGGAAACCTCCGAAC

TATGCCTATCTATCATATATATCCTGACAGCCTTCCCTGGTGGCCCGAGCGCCCAACACCA  
AGTATCCTTCGTTTCCGGAGTTTGTCAACTGGCTGCTCGACCAGGTGAAGCGGGGCAGCT  
TCATTGACATGCACTTTGTGGCGGCCACGTCGTTCTGCACACCCTGTCTGATTGTTTTCGA  
CATGATACTGAAGTTCGAGTCGCTCACAGAGGATCAATTATATCTAATCGAAAAGACTGGC  
CTGAAAAGGGTGATAGCGCCCGTGTGGCGCAACATGGGCAAAGGTGGCCGCAAGACGCA  
CGAACTCCAGCAGCAGTTCTATGCCAGCTCACAAGGCACGAAATGCTGGAGCTCTACGA  
GTATTACAAGTGAGTGGGACAATCTAATACCCCTTTTGATAGTGCTCTAACAGTCTTTGTTT  
TATTCCAAGATATGATTTTCGAGCTGTTTGACTACGATATCCAGGAGTATCTACAGGTAGCCA  
GACCAGACGAATCATCCGGCAGTCCAACGGCCACAAAGAATTAACCCAGCTCTAAATTCGT  
AGAATTTGCTAACGAAATGAATTAGTTCAACGAAAATACATATTAGCCGTCACAGTACGTAA  
TTGCAAATGTTGATAATACTGAATGAATACAATAATAAACTTAAATATATTTAAACGAAACGT  
TTTTACCGTCTATCGTTTTTTGGGCTGCTATCGATAAGCGGGATAACATTATATCGAACAAA  
TATCGGAACAAATATCGTTTGGGCCCATTTGGCATATTTGGAATTAGTGTGCCACAACAACT  
TTCTTCTGTTGCTAATTCCATGCACACATACCCTGGGGGAAATGAATGTTAAAAATTGAGAA  
AATGTTTGTCTTCCAAGGCTCAGTAGGTATCAGGATCGCTATAAATATATACAAGATACTAA  
TAATGTACTTGAATATGTCTAAAGAATATCAATTTGAGAAAAGGTCTTTATAAATCACGTTTC  
ATCTTCATATAAAATTAACAAAATAGGGTATACAAAGGCCAACACGCAACATAGAGACTCTT  
TTTTGTTGACTTTTTCGTTTAAACCTTTTTTTACAATAAATACAATAAAAGCAAGGATTAGG  
TTAGGATAGGTTTCAGGCGGTAGCCTGGGGGAGTGATGAAACCCTCCCAAGCTCACTTGA  
CCTGTAGAAGGTCCGTTGTGGTGCCGCATGAGCGTGTGCCCTTCCCAGTGCCTAAAAAC  
CGTGGAGAAACAGGCTGTTGCAAATTAAGGGCAGTCCCATCCGGAGGCTTGGATGAATCT  
GGACAAGGTCCCCGGTTTGATTTTCGGACAGGTCCGAAATGTCTGTGAGGAAAGCAGCCCC  
GAGAAAACAAAGACGACGATTTCCAAGGGCCGAGCAGTGTGAGAAGAAGTGGGGGACCG  
ATTCCTCCTCTTCCTCGTCGCGACAACTCCTGCAGAAAGTCGTTATGAGGGATTGACAGTCT  
AGAGGCATGAGTGCCAATCTGCCAGTGTCCCGTAATGGCACGAGTAACTGCAGAGCACTG  
TGCTCTGCTGAGCCTATACAGCTCGGCTGAGCGCTTCTTCGATCGATATGGCCATATCAAT  
CTTGAGATTTTACAGGAAATCTCCTATTGGCATTTCGCTCGAACAATTCGTGCGTGAAGAGC  
CTGCACGTAGCCAGAGGCATCGCTACCTGCTCCCTCTCCATAAGGAGAGGAATTGTAGTA  
CCCTGCCTTGCTAGCTCGTCGGCGGCGTCTGTTCCCTCGATGTCCCTGTGGCCTGGGACC  
CATATAAGGAAGAGGTCTAACTGATCTGCGATCTCGTGCAGAGACCTGCGGCAGTCATTTA  
CAGTCGCTGAGTTCGACGATATTGAGCCTAGAGCTTTAATAGCTACTTGGCTGTCCGAGAA  
AACGCACACTAAGTGGCGGTNGTCTNAGAAAGTAGTTGCAGACGATGGGAATGGGCCTCAC  
TCNACAGCGTCTGCGGGAATTAACCTGAATGCCTATAGCAACATCGTCCGCATACGCCAC  
CACACGGCAGCCACCCCCCTCTATCTCCCGCAGCAGTTCGTTCACTGCCACGTTCCATAG  
GAGGGGCGAGAGGACTCCGCCCTGCGGGGTGCCTCTACTGACAAATCTGGTGGACGTTG  
ACGTCCCCAGTGATGCCTCAACCGTCCTGCATTGTAGCATCTGATCGATCAGTTTCACCGT  
CCGGGAGTCAACCCCCAGGTCCGTCAGTGCACCCGTGATGGCGGTGCGGAGGATGTTAT  
TAAAGGCGCCTTCTATGTGAGGAAGGCTACCAGGGTGTACTCCTTACAGTTGAGGGACG  
CTTCTATGATCGATGTGATCCTGTGTAGGGCCGTTTCGGTGGATCTTCCTTTCCGATAGGC  
ATGCTGGGAGTCTGAGAATAGACTAGGCGGAATATTTACCGTGAGATGCATCCCCAAAAGC  
CGTTCCATCGTCTTCAGAAGGAAGGACGATAGACTTATGGGTCTGAAATCTTTGGGGGCAG  
TGTGCGAGGGCTTGCCTGCCTTGGGGATGAAGACGACTTTGGGATGAAGACAGGTTTCCG  
GGATATATCCATGGGAGAAGATTCCCTCGTATATCCTTTTGAGCCAATTAGTGGCTTNTTGT  
CCAGCGTGAATCAGTTAGGGCAGGGATGATGCCATCTGGTCCCGCAGACTTGTATGGTTT  
GAAGCTTTTTATTGCCCGGGCTCCTGGCTAAGCAGGTTTCATGATAACACTTGAGGCAACGG  
AGGGAGCCGCGATGTAGTGTGGTCTGTTTTTCATCGCAGCCGGGAAAGTGGGTGTTAAGGA  
GAAGATTTAGCGACTCATTGCTGGACGTTGTCCATGATTAGTCGGCGTTCTTCAGGTAGCC  
CAGAGTGGGTGTAGTCTTCGAGAGAACTTTGCGCAAGCGCGAGGCTTCCGAGTTATTCTC  
AATGTCGCTACAGAACTTACGTCATGAGGCGCGTTTGGCTTTCCTCAGTTCTTTATTGTAAA  
CTGACAGACTGGCCATGTAATCGGCCAGTTCTGCTCAGCGTTTTTCAGCCTTATCTTTATT  
GAAGAGTCTTCGGGAGGCTTTCGGAGTTCCTCAGTTTCGGATTCCACCATTGAGTTTC

TTCCGGCCTCTGCTCTTGCTAGAGGGGACGATCTATCGAGCGCGTCATTGCAGGCGTCG  
GTACATAGCTTAACAAGATGAGTCGTGGCTTCCCTGGAGATCTCCTCCTCAGGGAGAACAC  
GACAGAGGTGGTCTGAGTACCGAGCCAGTTTGTCCGCCTAAGGTTCCGAAATGAGCTGG  
CCTCGGTAGTGAAAAAGAGAATACGGTTTCCACGTACCTGTGGTCCGAGAAGGAGTGCTC  
TTCCAGGACCCCCCAGGATACGATGTTCCCGTGTAACCTCATGAGAGGCAAGTGTGAGGTC  
CAGGACCTCCTTGCGGTTTTTAATAATGAAGGTGGGATCACTCCCCCTATTTAAAGGACC  
ATCTGAGTGGTCAGTAAATAGTTGAAAAGGTA CTACCCCTTTCGTTGGTGTGAGTGCTTC  
CCCACTGGCAGTGGTGTGCATTGGCGTCGCACCCTACGATTAGGCCGGTGTCTTGGCCT  
CGCAGTCTATGATTAGCTACGTATAGCTTATAGTCAGGAGTCCTCAGACCAGAGACCCTGT  
TTCCGAGGATCCAGGGCTCCTGAATGAGGACTATGTGGCTCCACCCTTGGNCTAGNGTG  
GNGCAGGAGAGCAGCGCATGCTGCCTTACAAAGGGTGGNGGTTTATCTGCAGGAGTATCA  
GTGACATTCTGAGGTTACCTCCACCATTGCTCTGTCGTGGTTCGCTTTCCGAAGAGTCAA  
ACTCCTCCGCGACCCCGATGTGCTTGAGATCCCTAGTAAGATCGCTCACGTCTGACACGTA  
ACCATTAAGGATGTCATCCGACACCACTGATGCCACGTCTGACACCGCAGGCTTGATCTCC  
ATACTAGGGATCTCCGGGAGCTCCAGGTCTGGCTCGACCGTCGGTTGCATGCCTTTGAG  
TCGGACTTGACGGTACTACGACTACCTTCTTGTAGCCGTAGTCCCACAGCGCCCTCCGTG  
TCGTGGAGAAGTCTGACCGACTCCTCGTTCAGGACGAGGATGATTTGGCGCCTCTGCCCG  
TTGCTCTCCTCTACCTTGGACACCTNCCAATCGGCTGTGGGAAGGTGGGGGTTGCAGACC  
TGCAGAATCCGGAGAATCTTATCCGACTCTGCANNCTTCGCCGAGACCCACGCTCTGGC  
CCTCGGCTTGCTTCACTTCACGACCTCCAGCTGGGCTCCTGGGTAGACCTCCTTGAGCGA  
CGCTACCGCCTTCGCGTAGAGGGCCGCCGAGCGAGCATGTTGGCAGGCGATGGCTTTCA  
CCCTGCCTTGGTGCCACCCGGCGTCCTCTCACTTGGGCGGTGGTCTCATTCTCCTCCA  
ACTCCTGGAGGAAACAGTCTTGAGCTCGTTTTCCACGAGGTGCCACTTGTCCCTAGGGA  
TCTGCCCCGTCTTTAGAGCCCCTGTCTAGGACTCCAATCAGGGTTTTTCCCTCGCCACCTC  
GGCAAACGAGCGGTTGCTCAGTGTCTTCGTCTCTTGGCCTGTTGGA CTTGTGTGGCGGT  
GTCTCCGCCAGCTTTGGCTGGCTGGTAGTCGGGCATGACTGTCTTGGCCCATCGCGGC  
GATTTCGATTCCCTGGGCAGACGCCCGAACACCGGGTCGTCTTGGCCAGGATGAAGGC  
CGCACGTCTTTGTCTGGA ACTTGGGCCTATCTTTCGAGGCAGAGGCGCCGCCTGCCGG  
GGTTGTCAAGGGGTTCCCGGTCCCTAGGGGTCCGCCAGCCGCGATATCGCTCTGCATGAT  
CGCCCCCCCCGTAACCGGGTCGCCCTTGGGGCCCCCGATGTGGATTGGCCCGATTGGCT  
TTTCGGTCTCTCCTCAAAGCGCCTGCTGCCTCGAGACGGTGGACCGACTTAGTCTCCTTC  
CCCGTCTTTTTGGGCACTGGTTTCCAGATGCGTTGTAGAGGGATGGTCTTTCCTCCGGCAC  
TTAGGAGGAGTGCCGTGCTCCTTGCGGTGTTTTAGTTTTAATATTAATTTGGCATATTTG  
ATCCACAGAGTAGGCGGGAAGGGGTTAGTCGCCCGAGCATAGCCCGCGTGCCCCGGGAA  
GCCTTATTA AAACTGGAGGTCGGCAGGTATCCAGAGTCCGCATACATACATATGTATGTAT  
GTATGTATGTATAAGCGACCGAGCACCCCTCGGCCATGCATCCCTCGGCATATGAGAGT  
GTCACCTTGGATTGGGGTTATTTCACTGAGAGTTTTCTTCTCTCCGCCCGACTACAATTAGC  
CAGTATCCTGGCAGAGACATGACCGTACCAGGACCTGTTTCCAGCCGCCGTACGGAGAG  
AGTATAGTCGCACTTCCGCCGGTGTGTACAGTTACGGCGGGTGCGGGTTGCTCGTGGCC  
ACCTGTATCCTATGACGCGGAGCACAGTCGCCTTGGATCCAGGGCAAGCCATGAACCAGA  
GGCGCCTGTGCCCCGTTCCGAGTCTACAGTTGTGACGAGCCGACCCGACATCCGTTTATC  
CCCCTGTAGCACCCGACGGCTGACGGCCAAAAGCAAGGATTA AAACTAATAATCTTGTA  
GAA AATTGACTCATCAATGGAATAAACTATGTGGGCATTGCTGAGAGATTTAGTTAGTCAG  
CATTATTCAATGGAATATCACAATTGAGCAATATGAACGAATTTCATTTTTCGTTTGTCTTGA  
TTGACCTATTTGCTACTTGTTTTTTGTTTGACTTATTTGCTAAAACCTTTTTACGCAA  
AACGCAATAAAAGCAAGTATTAAGAATACACCAGTTAAATAGAAATTGATTCATCAATCGT  
ATAAAATTATGTGGGCATGGTCAAATTTTCTATCTAGCTAATAATATTCCTCGGAATATCAAA  
AACGAGGAATATGTAAATAGAACTGGAATTCGTCA GTATATTTAAGGTATATTTTTAAATG  
AGACGGTATATTTCTAAGGGTCGGACGGTATATTTAACGCGGTCAGACTGCAGCACTGCA  
ACATCAACAAACGCCACGACCTATAAAAATTGTAAATTA ACTGACACCGAAAATGAATGAG  
TAATTCAGTGAGAATCAATCGAAATTTATTAGCTAGAAGCATAGGCAAGGCATAAGCAAAAA

TACTTACTTGTTTGTGATTTAGAGAGCTTCGGCATTGCACTGACGTGGACCTGAAAGATTAG  
AAACAGGTGAGGCGACATGTGCATGCATTATCTAGATTGAAATCAGTCTGGTACACCTTTT  
GGCAGACTTCCAATATGTCCACAGCACGGCGGCGGCCCCAGGGTGGCAGTGCGGGCGAT  
GTACAGAGCTACCACCCGAAGGAAAGGCTGGTGGAGAAGGACGAGGGAACGCCGGACAT  
ACGCGGCGACAGACGGAACATAGCCATCCTGCTGTTCTGTATATACTGCAGGGCATAACC  
CATCGGCCTGATAGCCGCCATTCCCATGCTGCTGCAGAACCAGGGGAGCCAGCTACAAGCA  
GCAGGCGGAGTTCTCCTTCGCCTACTGGCCGTTTCAAGCTACTGTGGGCCCCCAT  
CGTGGACTCGCTTTACGTCCGGAGATTCGGGCGCCGCAAATCGTGGCTGGTGCCGGTGC  
AGTATCTGCTTGGCGGATTCATGATGTTCTTTCTACTACGTGGATCGTTGGCTGGGCGG  
CGATGGTGTGGAGCCGAATGTGGCGCTGCTGTCGCTGCTCTTCTTCTGCTCAATTTCTG  
GCTGCCACCCAGGACATCGCTGTGGACGCTGGCTCTGACTATGCTGAAGCGCTGCAATGT  
AGGCTACGCCTCCACCTGCAACAGTGTGGCCAGACAGCCGGCTACTTCCTTGGATATGT  
GTGTTCAATTGCCCTCGAATCGAAGGACTTTTGCAACAAGTACATGAGGGATGTGCCCTGA  
ACGAGGGCATGATCACGTTACCACGCTTCCTCTGGTTCTGGGGTATTGTCTTTGTGGTGGC  
CACCCTCTGGTGGCAATCTTCAAGAAGGAGAATGACATTGAAGATGCCCATACGGAATCT  
CGCTACACGGAGGAGCATGAGCTGAACATTCTGTCAGAGCTACAAGATCCTCTGGGACATG  
GTGAAGATGCGACCAGTGCAGATCCTAGCCGCCATTCTGCTCACCGTTAAGGTAACCTTCT  
CCGCATCGGATGCGGTACCAAGTCTGAAGCTCATCGATGCCGGGGTGCCCAAGGATCAG  
CTGGCTCTGCTGGCCATCCCCCTCATTCCCCTTCAGCTCGTCCTGCCCTGGTGATGGGT  
CGCTACACCAACGGCCCGCGTCCCATGGATGTGTATCTGAAGGCCATTCCATATCGAATTC  
TTCTGGCCGCGGTGGCGACAATTTTCGCCTACGCCACACCTTTTATGGTGCAGAAAGGGC  
ATGTCCAGTGTACTATTATGTCCTTCTGATCGCCCTGTATGCCTGCTATCAGGTATTCCTG  
TACTCAATGTTCTGTGGCGGCCATGGCATTCTTTGCAAAGATCTCGGACCCCGCTGTGGGT  
GGCACATACATGACATTCCTCAACACGCTGTGTAATCTGGGCGGCAATTGGCCCAACACG  
GTGGTGCTCTGGCTGGTGGACGTGCTCACATGGAAACAGTGCACCACCAATACGGATAAT  
ACGTGCCTCAATAAGGATGAGCAACAGGTACGAGAAGACTCTACCCACCTTCTGTGGTGTT  
TTTCAACTAATCTAGTGCCCTCCCTCACTCCTTATAGAGCTGTGAATCGTCACACGGCAATT  
GCGAGAT

**Details and caveats for the crossing scheme used to generate *SR* and *ST* lines:**

From the analysis of differential gene expression, a total of 868 significant genes were detected off the *X*-chromosome. Although these differences may be the result of *trans*-acting factors associated with genetic variation located on *XR*, our crossing scheme maintained lines through different sets of marker strains, possibly creating structured variation on the autosomes. Additionally, the *SR* and *ST* strains carry different third chromosome arrangements (Arrowhead for *SR* and Standard for *ST*) which are known to harbor an abundance of *cis*-acting expression differences. Indeed, a principal component analysis (PCA) of SNPs called in autosomal genes from the RNA-seq reads confirmed the presence of variation distinguishing *ST* and *SR* individuals (Supplementary Figure S5). It is therefore possible that these autosomal transcriptional differences may arise from *cis*-acting factors associated with structured genetic variation in the stock marker strains. As a result, autosomal comparisons to the *X*-chromosome were not considered for this study.

Additionally, to establish the *SR* stocks, lines were repeatedly backcrossed to *ct sd y se* marker strains which carry a *ST* *X*-chromosome. This backcrossing procedure was not used for the *ST* lines. As a result, recombination may have had a homogenizing effect on *XL* variation, potentially biasing patterns of  $F_{ST}$  and  $d_{XY}$  downward. While the exact extent of differentiation for *XL* between the *SR* stocks used here and natural populations is unclear, because of these potential biases we limit our comparisons between patterns of genetic variation on *XL* and *XR*. Moreover, our main conclusions regarding the age of the *SR* chromosome and the levels of differentiation and recombination suppression across the *SR* inversions do not rely on these comparisons.



## Supplementary Methods and Results

### Standard / Sex Ratio Females Fail to Produce Inversion Recombinants in

**cytogenetic mapping experiments.** Two isofemale lines one each collected from two localities (KBPN2, Kaibab National Forest, AZ, September 2017 latitude: 36° 24' 42" N; longitude: 112° 18' 48" W; AO4, Allred Orchard Farm Market, Provo, UT September 2017, latitude: 40° 15' 43" N; longitude: 111° 39' 32" W) produced all daughters suggesting each female had mated to an SR male. We crossed the putative ST/SR daughters to a hemizygous male with a multiply marked X-chromosome. We individually crossed male offspring to ST/ST females (107 males from KBPN2 and 96 males from AO4). A single female larva (Figure S1) from each of the 107 KBPN2 and 96 AO4 male test crosses were karyotyped using standard cytogenetic methods (Painter, 1934). Specifically, we scored the XR chromosomal karyotype where all female offspring carried a ST chromosome derived from the F1 female parent plus the parental or recombinant chromosome from the tested male (Figure S2).

In the sample of 107 KBPN2 and 96 AO4 males from a ST/SR female, we found no recombinants among the three non-overlapping inversions. Thus, non-overlapping inversions are inherited as a single unit. The frequency of the ST gamete is not significantly different from the expected frequency of 50 % (see Table S9, KBPN2, binomial sign test  $P=0.281$ ; AO4, binomial sign test  $P=0.063$ ). The sex ratio for the ST arrangement was near 50% for both strains while SR males sired > 96 % daughters (Table S10). A t-test with unequal samples shows that the mean sex ratio is significantly different between ST and SR males (KBPN2,  $t=51.64$ ,  $df=56$ , two tailed  $P = 6.3 \times 10^{-49}$ ; AO4,  $t=33.73$ ,  $df=91$ ,  $3.18 \times 10^{-53}$ ). Interestingly, the mean number of offspring produced did not differ between ST and SR males (KBPN2,  $t=0.34$ ,  $df=100$ , two tailed  $P = 0.74$ ; AO4,  $t=-0.00$ ,  $df=92$ , two tailed  $P = 0.99$ ). Despite a reduction in Y-bearing sperm, SR males produce a similar number of offspring as a ST male.

### Random Union of Gametes Model of Linkage Disequilibrium Decay

The comparative genomics analysis of SR chromosomes revealed an ancient origin of the inverted arrangements with extensive genetic differentiation stemming from greater than two million generations without gene flow. Consistent with this work, natural population sampling indicates all three inversions are found in near perfect association ( $r^2 = 0.998$ , Table 1) (Nielsen and Slatkin 2013). However, direct experiments demonstrate the array of three inversions can be readily broken apart, which qualitatively suggests recombinant chromosomes should be more common in nature and genetic differentiation should erode in the ~5 Mb collinear region between the medial and terminal inversions. To quantitatively understand the interaction of low levels of recombination (on the order of  $10^{-3}$  per meiosis) over long periods of evolution (on the order of  $10^6$  generations) we introduce a two locus, two allele population genetic model for the decay of gametic phase disequilibrium (Crow and Kimura 1970).

Consider a locus with two alleles ( $A$  and  $a$ , with frequencies  $p_A$  and  $p_a$ ), a second locus with alleles ( $B$  and  $b$ , with frequencies  $q_B$  and  $q_b$ ), and a recombination frequency between these loci denoted  $c$ . Let  $P_{t(AB)}$  be the frequency of a haplotype carrying alleles  $A$  and  $B$  among the gametes produced in generation  $t$ . In any given generation, a particular copy of the  $AB$  haplotype can either be inherited intact from the previous generation with probability  $1 - c$ , or alternatively be the product of a recombination event with probability  $c$ . In the former case, the

frequency of the haplotype is equal to its frequency in the preceding generation denoted  $P_{t-1(AB)}$ . In the latter case, under the assumption of random union of gametes (*i.e.*, independence of egg and sperm allelic states in Hardy-Weinberg equilibrium), the probability of a haplotype stemming from recombination having alleles  $A$  and  $B$  is simply the product of their respective frequencies in the population ( $p_A q_B$ ). Therefore, we can describe the frequency of the haplotype of interest  $P_{t(AB)}$  in generation  $t$  as a function of its frequency in the previous generation  $P_{t-1(AB)}$ :

$$P_{t(AB)} = (1 - c)P_{t-1(AB)} + cp_A q_B \quad \text{Equation 1}$$

After subtracting  $p_A q_B$  from both sides of equation 1, rearranging, and iterating following Crow and Kimura (1970), a recursion equation for this model of gametic phase disequilibrium can be written as:

$$P_{t(AB)} - p_A q_B = (1 - c)^t (P_{0(AB)} - p_A q_B) \quad \text{Equation 2}$$

where  $P_{0(AB)}$  represents the initial  $AB$  haplotype frequency, and the left-hand side of equation 2 (the difference of the observed haplotype frequency  $P_{(AB)}$  from the expected frequency  $p_A q_B$ ), is recognizable as the classical coefficient of linkage disequilibrium  $D_{(AB)}$  (Ewens 2004). Finally, because recombination is restricted to females in *D. pseudoobscura*, the crossover rate in this population model must be corrected to one half the experimentally determined recombination frequency. In this way the frequencies of all four haplotypes ( $AB$ ,  $Ab$ ,  $aB$ ,  $ab$ ) can be predicted within a population at any future generation  $t$  given initial conditions  $P_0$  with the series of equations:

$$P_{t(AB)} = \left(1 - \frac{c}{2}\right)^t (P_{0(AB)} - p_A q_B) + p_A q_B \quad \text{Equation 3a}$$

$$P_{t(aB)} = \left(1 - \frac{c}{2}\right)^t (P_{0(aB)} - p_a q_B) + p_a q_B \quad \text{Equation 3b}$$

$$P_{t(AB)} = \left(1 - \frac{c}{2}\right)^t (P_{0(AB)} - p_A q_b) + p_A q_b \quad \text{Equation 3c}$$

$$P_{t(ab)} = \left(1 - \frac{c}{2}\right)^t (P_{0(ab)} - p_a q_b) + p_a q_b \quad \text{Equation 3d}$$

Here we define locus  $A$  as the basal and medial inversions of  $SR$  chromosomes and locus  $B$  as the terminal inversion, we obtain frequency data for  $p_A$  and  $p_B$  from published data on natural population sampling (Table 1), and estimate recombination frequency from our direct laboratory experiments (Figure 5B; Supp. Table S10). This parameterization allows for analysis of the asymptotic approach to linkage equilibrium and the evolutionary trajectory of all four haplotypes: Standard arrangement ( $P_{(ab)}$ ), recombinants ( $P_{(Ab)}$ ) and ( $P_{(aB)}$ ), as well as the fully intact  $SR$  chromosome ( $P_{(AB)}$ ). Under this neutral model the half-life of LD is only 577 generations, with effective linkage equilibrium achieved within 10,000 generations. Furthermore, the near perfect association of  $SR$  chromosome inversions should have completely broken up long ago,  $F_{ST}$  in (as well as LD across) the collinear regions should be substantially lower, and recombinant  $SR$  chromosomes should be found at an average frequency of approximately 0.12 in present day natural populations.

By using the observed present-day frequencies of  $SR$  chromosomes and their rare recombinants observed in nature (Table 1) we can estimate the equilibrium haploid selection coefficients ( $s$ ) associated with recombinants using a modified version of equation 1:

$$\hat{P}_{(aB)} = (1 - s_{aB}) \left( \left( 1 - \left( \frac{c}{2} \right) \right) \hat{P}_{(aB)} + \left( \frac{c}{2} \right) p_a q_B \right) \quad \text{Equation 4a}$$

$$\hat{P}_{(Ab)} = (1 - s_{Ab}) \left( \left( 1 - \left( \frac{c}{2} \right) \right) \hat{P}_{(Ab)} + \left( \frac{c}{2} \right) p_A q_b \right) \quad \text{Equation 4b}$$

Solving for  $s$  under these conditions yields  $s_{aB} = 0.316$  for the terminal inversion only recombinant and  $s_{Ab} = 0.649$  for the basal and medial inversions recombinant, respectively. The haploid estimates represent the extremely intense epistatic selection acting against recombinant genotypes and are consistent with the conditions determined by numerical analysis of the drive-selection balance model (viability selection assuming complete recessivity  $s_{aB} > 0.01$  and  $s_{Ab} > 0.29$ ). These theoretical considerations demonstrate the only way a two million generation old chromosome-wide coadapted gene complex can show no signs of gene flow given our laboratory estimates of recombination is to have strong epistatic selection against recombinants, not just in present day populations, but throughout the long evolutionary history of *SR* chromosomes.

**Drive-Selection Balance Model of Linkage Disequilibrium Decay.** In the previous supplemental section a general model for the decay of gametic phase disequilibrium is presented. The general model only treats gametic frequencies using the random union of gametes assumption under strict neutrality. Here we relax these assumptions by incorporating specific properties of *SR* chromosomes: X-linkage, male-specific segregation distortion, female-specific recombination, sex differences in allele frequencies, and enforcing equilibrium drive-selection conditions. The resulting model described below is substantially more complex, requiring treatment of additional parameters as well as explicit modeling of both genotypic and gametic frequencies for each of the sexes separately. However, the qualitative result of the general simple model in the main text and the specific complex model in this supplemental remain the same: the three-inversion state of *D. pseudoobscura* should have reached linkage equilibrium hundreds of thousands of years ago and can only be maintained by strong epistatic selection.

Consider a X-linked locus with two alleles ( $A$  and  $a$ , with frequencies  $p_A$  and  $p_a$ ), a second locus with alleles ( $B$  and  $b$ , with frequencies  $q_B$  and  $q_b$ ), and a recombination frequency between these loci denoted  $c$ . Let  $P_{t(AB)m}$  be the frequency of a haplotype in the male gametic pool carrying alleles  $A$  and  $B$  produced in generation  $t$ . Additionally, let  $G_{t(AB)m}$  be the frequencies of male hemizygous genotype carrying alleles  $A$  and  $B$  in generation  $t$ . Following this form,  $P_{t(AB)f}$  is the haplotype frequency in the female gamete pool and  $G_{t(AB/ab)f}$  would be the frequency of the female coupling phase double heterozygote at generation  $t$ . Here, we divide a generation into three stages: genotypic frequencies pre-selection ( $G_{t(AB)m}$ ), genotypic frequencies post-selection ( $G'_{t(AB)m}$ ), and then gametic frequencies ( $P_{t(AB)m}$ ). These stages are connected by three processes: viability selection ( $s_{AB}$ ) to transform pre-selection genotypes to post-selection genotypes, female-specific recombination ( $c$ ) transforming female post-selection genotypes to female gametic frequencies, and male specific meiotic drive ( $k_{AB}$ ) transforming male post-selection genotypes to male gametic frequencies. Finally, sex-specific gametic frequencies are used to calculate the next generations pre-selection genotypic frequencies. A diagram of this model is illustrated in Supplemental Figure S6.

For an X-linked locus, male hemizygous pre-selection genotypic frequencies are solely a function of female gametic frequencies in the previous generation:

$$G_{t(AB)m} = P_{t-1(AB)f}$$

$$G_{t(aB)m} = P_{t-1(aB)f}$$

$$G_{t(Ab)m} = P_{t-1(Ab)f}$$

$$G_{t(ab)m} = P_{t-1(ab)f}$$

In contrast, female genotypic frequencies are determined by both female and male gametic frequencies in the previous generation:

$$G_{t(AB/AB)f} = (P_{t-1(AB)m})(P_{t-1(AB)f}) * 2$$

$$G_{t(aB/AB)f} = (P_{t-1(aB)m})(P_{t-1(AB)f}) + (P_{t-1(aB)f})(P_{t-1(AB)m})$$

$$G_{t(Ab/AB)f} = (P_{t-1(Ab)m})(P_{t-1(AB)f}) + (P_{t-1(Ab)f})(P_{t-1(AB)m})$$

$$G_{t(ab/AB)f} = (P_{t-1(ab)m})(P_{t-1(AB)f}) + (P_{t-1(ab)f})(P_{t-1(AB)m})$$

$$G_{t(aB/aB)f} = (P_{t-1(aB)m})(P_{t-1(aB)f}) * 2$$

$$G_{t(Ab/aB)f} = (P_{t-1(Ab)m})(P_{t-1(aB)f}) + (P_{t-1(Ab)f})(P_{t-1(aB)m})$$

$$G_{t(ab/aB)f} = (P_{t-1(ab)m})(P_{t-1(aB)f}) + (P_{t-1(ab)f})(P_{t-1(aB)m})$$

$$G_{t(AB/Ab)f} = (P_{t-1(AB)m})(P_{t-1(Ab)f}) * 2$$

$$G_{t(ab/Ab)f} = (P_{t-1(ab)m})(P_{t-1(Ab)f}) + (P_{t-1(ab)f})(P_{t-1(Ab)m})$$

$$G_{t(ab/ab)f} = (P_{t-1(ab)m})(P_{t-1(ab)f}) * 2$$

The pre-selection male genotypic frequencies are transformed to post-selection genotypic frequencies in this model by selection acting on deleterious effects associated with *SR* and recombinant chromosomes with relative fitness of standard chromosomes set to unity and then adjusted by mean population fitness of males  $\underline{w}_m$ :

$$G'_{t(AB)m} = (G_{t(AB)m}(1 - s_{AB})) / \underline{w}_m$$

$$G'_{t(aB)m} = (G_{t(aB)m}(1 - s_{aB})) / \underline{w}_m$$

$$G'_{t(Ab)m} = (G_{t(Ab)m}(1 - s_{Ab})) / \underline{w}_m$$

$$G'_{t(ab)m} = (G_{t(ab)m}) / \underline{w}_m$$

The pre-selection female genotypic frequencies are similarly transformed in this model assuming deleterious effects of both *SR* chromosomes and recombinants are fully recessive:

$$G'_{t(AB/AB)f} = (G_{t(AB/AB)f}(1 - s_{AB})) / \underline{w}_f$$

$$G'_{t(aB/AB)f} = (G_{t(aB/AB)f}(1 - s_{aB})) / \underline{w}_f$$

$$G'_{t(Ab/AB)f} = (G_{t(Ab/AB)f}(1 - s_{Ab})) / \underline{w}_f$$

$$\begin{aligned}
G'_{t(ab/AB)f} &= (G_{t(ab/AB)f})/\underline{w}_f \\
G'_{t(aB/aB)f} &= (G_{t(aB/aB)f}(1 - s_{aB})) / \underline{w}_f \\
G'_{t(Ab/aB)f} &= (G_{t(Ab/aB)f})/\underline{w}_f \\
G'_{t(ab/aB)f} &= (G_{t(ab/aB)f})/\underline{w}_f \\
G'_{t(Ab/Ab)f} &= (G_{t(Ab/Ab)f}(1 - s_{Ab})) / \underline{w}_f \\
G'_{t(ab/Ab)f} &= (G_{t(ab/Ab)f})/\underline{w}_f \\
G'_{t(ab/ab)f} &= (G_{t(ab/ab)f})/\underline{w}_f
\end{aligned}$$

In this model, female gametic frequencies are a function of recombination ( $c$ ) and mendelian segregation acting on female genotypic frequencies; in contrast, no recombination occurs in males and the male gametic frequencies are dictated by the action of meiotic drive ( $k$ ) as determined by male genotypic frequencies. Therefore, male gametic frequencies, including Y bearing sperm  $P_{t(Y)m}$  are:

$$\begin{aligned}
P_{t(AB)m} &= (k_{AB}) G'_{t(AB)m} \\
P_{t(Y)m} &= (1 - k_{AB}) G'_{t(AB)m} + (1 - k_{aB}) G'_{t(aB)m} + (1 - k_{Ab}) G'_{t(Ab)m} + (1 - k_{ab}) G'_{t(ab)m}
\end{aligned}$$

Female gametic frequencies based on mendelian segregation and recombination in both coupling and repulsion phase double heterozygotes are:

$$\begin{aligned}
P_{t(AB)f} &= G'_{t(AB/AB)f} + \frac{1}{2}(G'_{t(aB/AB)f}) + \frac{1}{2}(G'_{t(Ab/AB)f}) + \frac{(1-c)}{2}(G'_{t(ab/AB)f}) + \\
&\frac{c}{2}(G'_{t(Ab/aB)f}) \\
P_{t(aB)f} &= G'_{t(aB/aB)f} + \frac{1}{2}(G'_{t(aB/AB)f}) + \frac{1}{2}(G'_{t(ab/aB)f}) + \frac{(1-c)}{2}(G'_{t(Ab/aB)f}) + \frac{c}{2}(G'_{t(ab/AB)f}) \\
P_{t(Ab)f} &= G'_{t(Ab/Ab)f} + \frac{1}{2}(G'_{t(ab/Ab)f}) + \frac{1}{2}(G'_{t(Ab/AB)f}) + \frac{(1-c)}{2}(G'_{t(Ab/aB)f}) + \frac{c}{2}(G'_{t(ab/AB)f}) \\
P_{t(ab)f} &= G'_{t(ab/ab)f} + \frac{1}{2}(G'_{t(ab/Ab)f}) + \frac{1}{2}(G'_{t(ab/aB)f}) + \frac{(1-c)}{2}(G'_{t(ab/AB)f}) + \frac{c}{2}(G'_{t(Ab/aB)f})
\end{aligned}$$

Finally, although the action of the *SR* chromosome alters the sex ratio in progeny, we do not model non-Fisherian sex ratios at the population level. Therefore, at the beginning of each generation the male gametic frequencies of Y- and X-chromosome bearing sperm are adjusted to a 50:50 ratio by dividing by  $P_{t(Y)m}$  and  $(1 - P_{t(Y)m})$ , respectively, before being used to calculate genotypic frequencies in the next generation

To explore the decay of linkage disequilibrium on the *SR* chromosomes of *D. pseudoobscura* we use published data, our own experimental results, and preliminary observations on the behavior of recombinant *SR* chromosomes. The published record of species-wide *SR* frequencies weighted by intensity of sampling is 0.135 (Table 1 main text), and our model is initiated with complete absence of recombinants. In the

absence of recombination, the strong drive ( $k_{AB} = 0.99$ ) of *SR* chromosomes requires strong counterbalancing selection to prevent rapid fixation. Fitness defects must be present in both sexes, and upon the assumption of complete recessivity, a selection coefficient of  $s_{AB} = 0.431$  yields a stable equilibrium at the natural population frequencies.

In the presence of recombination, the stable equilibrium established by conditions  $k_{AB} = 0.99$ ,  $s_{AB} = 0.431$  rapidly breaks down. This is because the basal and medial inversion carrying recombinant goes to fixation in under 100 generations, with a LD half-life of only 47 generations. In agreement with published accounts, we observe the recombinant *SR* chromosomes with only the basal and medial inversions drive, while the recombinant *SR* chromosomes with only the terminal inversion segregates according to mendelian ratios. However, in preliminary analyses the drive of the recombinant chromosome is weaker,  $k_{Ab} \approx 0.75$  (S. Koury personal observation), and this reduced drive is used in our model. To discover the conditions under which recombinant *SR* chromosomes will not accumulate in nature despite our laboratory estimated recombination rate of  $c = 0.0012$ , we performed numerical analysis to identify to intensity of selection on recombination. In this model, where selection against the fully intact *SR* chromosome is  $s_{Ab} = 0.431$ , additional selection with  $s_{Ab} > 0.29$  and  $s_{aB} > 0.01$  is required to prevent establishment of recombinant *SR* chromosomes in natural populations.

**Table S1: *D. pseudoobscura* reference alignment statistics.**

| <i>Statistic</i>    | <i>D. pse ST</i> | <i>D. pse SR</i> | <i>D. mir</i> |
|---------------------|------------------|------------------|---------------|
| <i>Total Reads</i>  | 139337556        | 145236658        | 49649299      |
| <i>Mapped Reads</i> | 133512488        | 139245407        | 45556023      |
| <i>% Mapped</i>     | 95.82            | 95.87            | 91.53         |

**Table S2: *D. pseudoobscura* reference alignment statistics for genomic scaffolds.**

| Scaffold                          | Mean Coverage | Length   | % Covered | Covered (bp) | + Reads  | - Reads  | Read GC | Median Coverage | St. Dev. Coverage |
|-----------------------------------|---------------|----------|-----------|--------------|----------|----------|---------|-----------------|-------------------|
| <b><i>D. pseudoobscura ST</i></b> |               |          |           |              |          |          |         |                 |                   |
| 2                                 | 83.9129       | 30819483 | 97.5788   | 30073269     | 13841040 | 13841340 | 0.4403  | 85              | 40.51             |
| 3                                 | 85.9616       | 19787792 | 97.5288   | 19298803     | 9058245  | 9057166  | 0.4549  | 86              | 62.53             |
| XL_group3a                        | 44.7765       | 2692213  | 96.4761   | 2597342      | 642496   | 643846   | 0.4455  | 43              | 67.92             |
| XL_group3b                        | 54.3022       | 388551   | 98.341    | 382105       | 112865   | 113304   | 0.4266  | 45              | 122.17            |
| XL_group1e                        | 42.4095       | 12541198 | 97.8198   | 12267770     | 2878802  | 2874461  | 0.4426  | 42              | 26.38             |
| XL_group1a                        | 45.7357       | 9148293  | 96.8705   | 8861993      | 2257478  | 2255726  | 0.4523  | 42              | 81.27             |
| XR_group3a                        | 40.5871       | 1469181  | 97.7692   | 1436406      | 324078   | 324013   | 0.4676  | 40              | 16.46             |
| XR_group8                         | 41.4123       | 9197557  | 97.3256   | 8951575      | 2056823  | 2057328  | 0.4571  | 41              | 20.03             |
| XR_group6                         | 42.6727       | 13333775 | 97.5782   | 13010864     | 3061992  | 3063993  | 0.4477  | 42              | 34.97             |
| XR_group5                         | 51.3656       | 740970   | 98.7634   | 731807       | 203154   | 203069   | 0.4408  | 44              | 49.9              |
| 4_group1                          | 84.4553       | 5287126  | 98.1752   | 5190646      | 2402053  | 2400617  | 0.418   | 84              | 201.76            |
| 4_group2                          | 81.5053       | 1235759  | 94.4519   | 1167198      | 534344   | 533721   | 0.4381  | 85              | 62.7              |
| 4_group5                          | 80.7469       | 2439919  | 93.5238   | 2281905      | 1054607  | 1055036  | 0.4205  | 86              | 36.3              |
| 4_group3                          | 83.7848       | 11685562 | 97.9635   | 11447582     | 5288757  | 5290633  | 0.438   | 84              | 38.18             |
| 4_group4                          | 85.1283       | 6594820  | 96.8235   | 6385336      | 3016316  | 3013210  | 0.4307  | 86              | 58.84             |
| <b><i>D. pseudoobscura SR</i></b> |               |          |           |              |          |          |         |                 |                   |
| 2                                 | 85.6435       | 30819483 | 97.5044   | 30050367     | 14142848 | 14139655 | 0.4399  | 87              | 39.7              |
| 3                                 | 87.4484       | 19787792 | 97.5056   | 19294208     | 9232111  | 9227540  | 0.4545  | 87              | 61.44             |
| XL_group3a                        | 46.4184       | 2692213  | 96.4888   | 2597685      | 666643   | 668042   | 0.445   | 45              | 70.15             |
| XL_group3b                        | 55.1312       | 388551   | 98.2872   | 381896       | 114618   | 114974   | 0.4253  | 46              | 102.94            |
| XL_group1e                        | 43.8398       | 12541198 | 97.8332   | 12269454     | 2978752  | 2973251  | 0.4421  | 43              | 27                |
| XL_group1a                        | 46.3822       | 9148293  | 96.8344   | 8858691      | 2295757  | 2290161  | 0.4523  | 43              | 92.78             |
| XR_group3a                        | 44.1206       | 1469181  | 96.2329   | 1413835      | 356858   | 355122   | 0.4634  | 42              | 60.14             |
| XR_group8                         | 42.891        | 9197557  | 96.4071   | 8867101      | 2138713  | 2136598  | 0.4547  | 42              | 33.05             |
| XR_group6                         | 44.1551       | 13333775 | 96.608    | 12881487     | 3185838  | 3187677  | 0.4467  | 43              | 50.19             |
| XR_group5                         | 47.4404       | 740970   | 96.7479   | 716873       | 188068   | 188616   | 0.4374  | 45              | 39.7              |
| 4_group1                          | 84.1611       | 5287126  | 97.9979   | 5181270      | 2393844  | 2394017  | 0.4193  | 87              | 60.4              |
| 4_group2                          | 83.6336       | 1235759  | 94.4369   | 1167013      | 548437   | 547715   | 0.4372  | 87              | 58.68             |
| 4_group5                          | 83.2656       | 2439919  | 93.3848   | 2278513      | 1087501  | 1088924  | 0.4196  | 88              | 44.79             |
| 4_group3                          | 85.4123       | 11685562 | 97.8549   | 11434895     | 5396249  | 5400912  | 0.4376  | 87              | 40.35             |
| 4_group4                          | 86.743        | 6594820  | 96.7652   | 6381492      | 3076471  | 3073661  | 0.4303  | 88              | 52.09             |
| <b><i>D. miranda</i></b>          |               |          |           |              |          |          |         |                 |                   |
| 2                                 | 18.7027       | 30819483 | 93.6237   | 28854340     | 4027647  | 4027315  | 0.4583  | 18              | 18.38             |
| 3                                 | 20.1168       | 19787792 | 94.4606   | 18691673     | 2779677  | 2785477  | 0.4691  | 19              | 26.53             |
| XL_group3a                        | 19.4302       | 2692213  | 92.6627   | 2494677      | 368119   | 368015   | 0.4623  | 18              | 32.81             |
| XL_group3b                        | 29.0281       | 388551   | 91.2452   | 354534       | 79627    | 79773    | 0.4578  | 19              | 47.92             |
| XL_group1e                        | 17.8448       | 12541198 | 92.6182   | 11615438     | 1585445  | 1585920  | 0.4625  | 17              | 21.8              |
| XL_group1a                        | 19.6939       | 9148293  | 91.9186   | 8408982      | 1275755  | 1276178  | 0.4701  | 18              | 44.68             |
| XR_group3a                        | 19.3349       | 1469181  | 93.2392   | 1369852      | 201744   | 200722   | 0.481   | 17              | 69.58             |
| XR_group8                         | 17.3782       | 9197557  | 94.1218   | 8656902      | 1121618  | 1119342  | 0.4722  | 17              | 11.37             |
| XR_group6                         | 18.1368       | 13333775 | 94.4924   | 12599410     | 1690148  | 1689856  | 0.4622  | 18              | 24.69             |
| XR_group5                         | 20.3789       | 740970   | 94.8644   | 702917       | 105668   | 105158   | 0.4537  | 19              | 21.71             |
| 4_group1                          | 16.3376       | 5287126  | 90.9867   | 4810580      | 609460   | 610129   | 0.4451  | 16              | 16.38             |
| 4_group2                          | 18.8393       | 1235759  | 89.9682   | 1111790      | 162242   | 162151   | 0.4547  | 18              | 20.14             |
| 4_group5                          | 16.2932       | 2439919  | 88.1169   | 2149982      | 279051   | 278681   | 0.444   | 17              | 14.46             |
| 4_group3                          | 17.8253       | 11685562 | 93.7048   | 10949928     | 1461704  | 1460165  | 0.4556  | 17              | 23.03             |
| 4_group4                          | 17.2507       | 6594820  | 89.696    | 5915288      | 802786   | 803197   | 0.4491  | 17              | 22.14             |



**Table S3: The expected fold reduction in polymorphism in *SR* relative to *ST* obtained from simple neutral coalescent simulations.**

| <b><i>SR Frequency</i></b> | <b><i>SR-ST Divergence: 2M generations<br/>ST-Miranda Divergence: 4M generations</i></b> | <b><i>SR-ST Divergence: 4M generations<br/>ST-Miranda Divergence: 8M generations</i></b> |
|----------------------------|------------------------------------------------------------------------------------------|------------------------------------------------------------------------------------------|
| 30%                        | 4.75 (95% CI: 4.73-4.78)                                                                 | 5.59 (95% CI: 5.52-5.65)                                                                 |
| 13.5%                      | 10.68 (95% CI: 10.64-10.73)                                                              | 12.44 (95% CI: 12.39-12.49)                                                              |
| 1%                         | 150.83 (95% CI: 150.05-151.61)                                                           | 128.09 (95% CI: 127.21-128.97)                                                           |

**Table S4: Primers used to amplify intergenic regions for linkage disequilibrium analysis.**

| <b>LD forward primer sequence</b> |                        |
|-----------------------------------|------------------------|
| XL1_F                             | CTTTTGC GTGGGTGTGTTGC  |
| XL2_F                             | TGCAACCGCACTTGACCGTA   |
| XR1_F                             | ATGAGGGCGTTCCGAAAACAC  |
| XR2_F                             | GTGTTTGGGTCGGGAACAGC   |
| XR3_F                             | TGTCCCAGTCCCCGTTCTGT   |
| XR4_F                             | AGCTGCCATCCCATTCCAAA   |
| XR5_F                             | GGGCGAGACATGGGACATTC   |
| XR6_F                             | TGCCTCGACCCACGAATACA   |
| XR7_F                             | GCTGTTGCTGGGCAAACCTGA  |
| <b>LD reverse primer sequence</b> |                        |
| XL1_R                             | CGGGGACTCCTGCATTATCG   |
| XL2_R                             | CTCGGCCAGAACCCACATGCT  |
| XR1_R                             | GCATTGGCCCCGAAAAATCAAC |
| XR2_R                             | AGCCGAACAGAACCGCAAAG   |
| XR3_R                             | GCGGATTCTGAACCATTCCTG  |
| XR4_R                             | TAACTTGCACAGCCCCGTCA   |
| XR5_R                             | CGGCTTCGGGAACTTTGTGG   |
| XR6_R                             | ACGGAACAAAACGGCCAAGA   |
| XR7_R                             | AGCATCGCTTCGCATCTGTG   |

**Table S5: RNA-seq read mapping data.**

| <b><i>Strain</i></b> | <b><i>Reads</i></b> | <b><i>Assigned</i></b> |
|----------------------|---------------------|------------------------|
| KB10                 | 96835955            | 83070610               |
| KB12                 | 71249493            | 62675945               |
| KB1                  | 48891591            | 42325411               |
| KB2                  | 83033873            | 72656519               |
| KB3                  | 33197393            | 29127193               |
| KB5                  | 36001605            | 31805100               |
| NPZ11                | 93166191            | 80719581               |
| NPZ1                 | 57669830            | 50083732               |
| NPZ29                | 68329286            | 58163461               |
| NPZ33                | 33991458            | 30042015               |
| NPZ6                 | 95164635            | 82682359               |
| NPZ8                 | 37619356            | 31948845               |

**Table S6: Reads per kilobase per million mapped reads (RPKM) and differential expression statistics for all genes.**

*See attached file DpseSR.GeneExpression.Data.xlsx*

**Table S7: Counts of non-synonymous and annotated *cis*-regulatory changes in genes detected as differentially expressed on XR.**

*See attached file Dpse.TableS7.csv*

**Table S8. XR karyotype for tested male offspring from two ST/SR female strains.**

| <b>XR Karyotype<br/>(female gamete/male gamete)</b>                                                     | <b>KBPN2 No.</b> | <b>Freq</b> | <b>AO4_No.</b> | <b>Freq</b> |
|---------------------------------------------------------------------------------------------------------|------------------|-------------|----------------|-------------|
| Par 1 ST <sub>1</sub> ST <sub>2</sub> ST <sub>3</sub> / ST <sub>1</sub> ST <sub>2</sub> ST <sub>3</sub> | 50               | 0.467       | 56             | 0.583       |
| Par 2 ST <sub>1</sub> ST <sub>2</sub> ST <sub>3</sub> / SR <sub>1</sub> SR <sub>2</sub> SR <sub>3</sub> | 57               | 0.533       | 40             | 0.417       |
| CO 1a ST <sub>1</sub> ST <sub>2</sub> ST <sub>3</sub> / ST <sub>1</sub> SR <sub>2</sub> SR <sub>3</sub> | 0                | 0           | 0              | 0           |
| CO 1b ST <sub>1</sub> ST <sub>2</sub> ST <sub>3</sub> / SR <sub>1</sub> ST <sub>2</sub> ST <sub>3</sub> | 0                | 0           | 0              | 0           |
| CO 2a ST <sub>1</sub> ST <sub>2</sub> ST <sub>3</sub> / ST <sub>1</sub> ST <sub>2</sub> SR <sub>3</sub> | 0                | 0           | 0              | 0           |
| CO 2b ST <sub>1</sub> ST <sub>2</sub> ST <sub>3</sub> / SR <sub>1</sub> SR <sub>2</sub> ST <sub>3</sub> | 0                | 0           | 0              | 0           |
| DCO 1 ST <sub>1</sub> ST <sub>2</sub> ST <sub>3</sub> / ST <sub>1</sub> SR <sub>2</sub> ST <sub>3</sub> | 0                | 0           | 0              | 0           |
| DCO 2 ST <sub>1</sub> ST <sub>2</sub> ST <sub>3</sub> / SR <sub>1</sub> ST <sub>2</sub> SR <sub>3</sub> | 0                | 0           | 0              | 0           |
| Total                                                                                                   | 107              |             | 96             |             |

Par, parental; CO, cross over; DCO, double cross over;

**Table S9. Sex ratio (%female) variation across 107 and 96 F1 male offspring of a ST/SR female.**

| ST/SR Strain                | ST               | SR               |
|-----------------------------|------------------|------------------|
| KBPN2                       |                  |                  |
| Range %female               | 0.41 – 0.68      | 0.87 - 1.00      |
| Mean %female $\pm$ SD       | 0.53 $\pm$ 0.06  | 0.99 $\pm$ 0.02  |
| Mean No. offspring $\pm$ SD | 121.9 $\pm$ 51.2 | 125.2 $\pm$ 47.1 |
| AO2                         |                  |                  |
| Range % female              | 0.47 – 0.84      | 0.80 - 1.00      |
| Mean % female $\pm$ SD      | 0.56 $\pm$ 0.06  | 0.96 $\pm$ 0.05  |
| Mean No. offspring $\pm$ SD | 156.6 $\pm$ 39.9 | 156.6 $\pm$ 32.2 |

**Table S10: Counts from the recombination experiment. The reported recombination fraction is accompanied by exact 95% confidence intervals for the binomial distribution.**

| Gene Arrangement        | Visible Marker Classes |                          |                          |                                               | Recombination Fraction<br>(95% Confidence Interval) |
|-------------------------|------------------------|--------------------------|--------------------------|-----------------------------------------------|-----------------------------------------------------|
|                         | + +                    | + <i>sh</i> <sup>1</sup> | <i>se</i> <sup>1</sup> + | <i>se</i> <sup>1</sup> <i>sh</i> <sup>1</sup> |                                                     |
| SR Chromosome Isolate 1 | 1459                   | 0                        | 3                        | 1557                                          | 0.0010 (0.0002 - 0.0029)                            |
| SR Chromosome Isolate 2 | 1657                   | 0                        | 6                        | 1914                                          | 0.0017 (0.0006 - 0.0036)                            |
| SR Chromosome Isolate 3 | 1464                   | 0                        | 3                        | 1745                                          | 0.0009 (0.0002 - 0.0027)                            |
| ST Chromosome           | 321                    | 212                      | 253                      | 297                                           | 0.4294 (0.3996 - 0.4595)                            |



**Figure S1.** *D. pseudoobscura* male and female larvae (Anterior to Posterior, left to right). The male larva has an obvious gonad about a third of the distance from the posterior end of the larva.

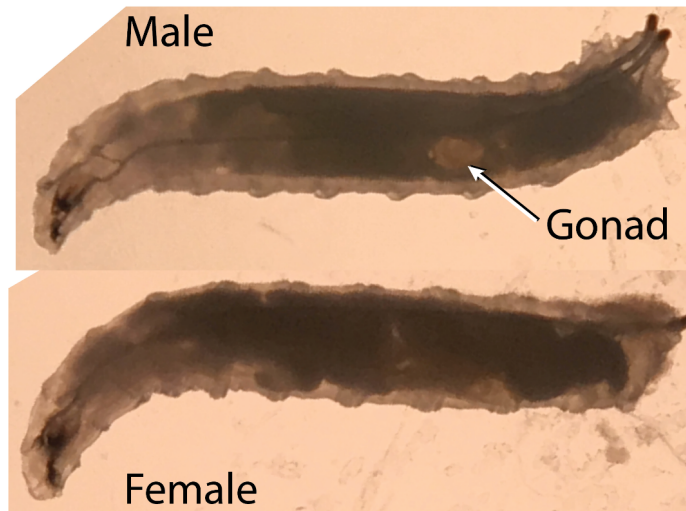

**Figure S2.** Genetic mapping crosses of KBPN2 and AO4 ST/SR females to detect cross overs among the three non-overlapping inversions that comprise the SR chromosome. Heterozygous ST/SR females were crossed to marked ST hemizygous males. F1 male offspring from each parental cross were individually crossed to virgin ST/ST females. Female larvae from each male were karyotyped at the three inversion loci. The F2 offspring were sexed and counted.

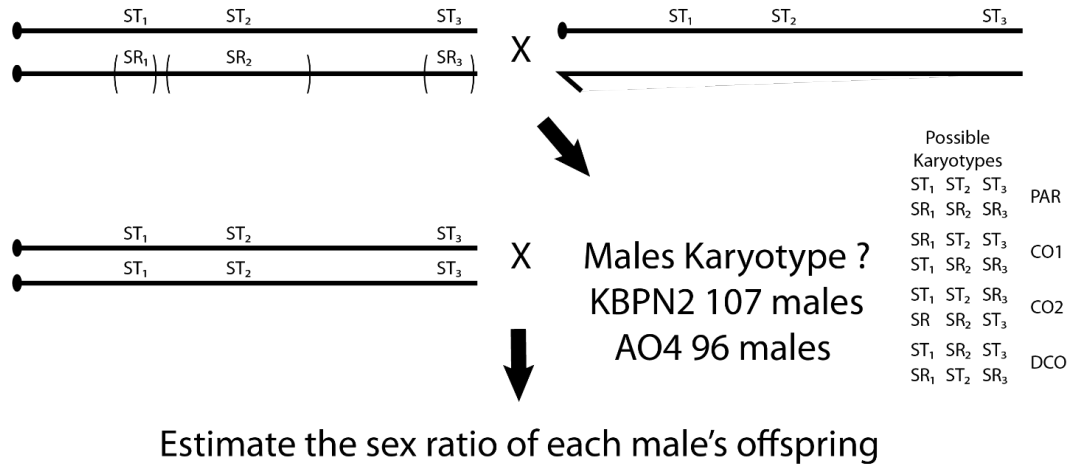

**Figure S3:** Patterns of polymorphism across chromosome *XR* in non-overlapping 10kb windows, considering all sites. A) Pairwise nucleotide diversity measured as  $\pi$  for ST (blue), SR (green), and across both chromosome types jointly (black). The lines are the loess smoothed trend lines and dots represent each window. The boxplot on the right summarizes diversity in different regions of the chromosome. Shaded regions in purple represent inverted regions. B) The same plots, but for the site frequency spectrum summarized with Tajima's  $D$ . C) Tajima's  $D$  summarized for chromosomal regions in non-overlapping 10kb windows considering all sites for SR (green) and for sites with shared polymorphisms masked for SR (light green).

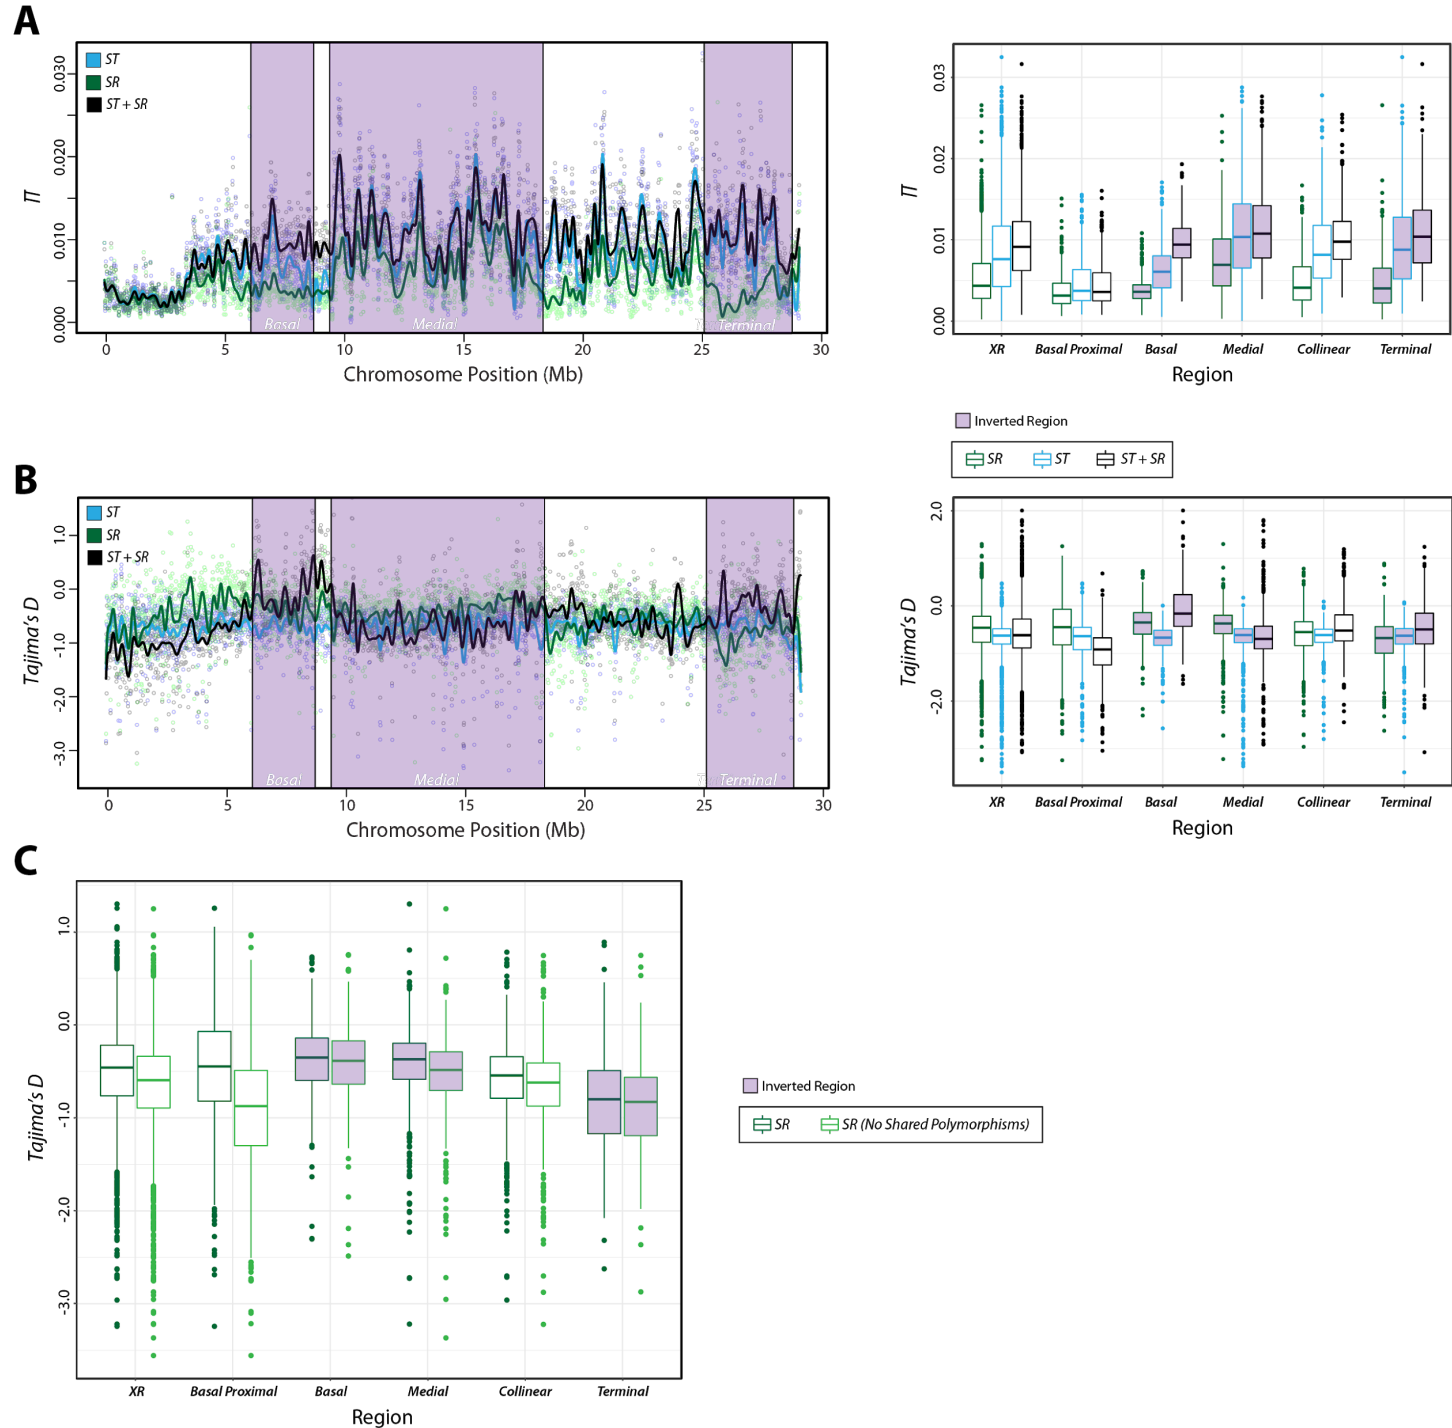

**Figure S4:** Polymorphism measured as the proportion of pairwise differences per-synonymous ( $\pi_S$ ; A) and per-nonsynonymous ( $\pi_N$ ; B) site for ST (blue) and SR (green). Each boxplot represents a region on the chromosome. The only significant differences (by Mann-Whitney  $U$  test) are detected as reduced  $\pi_S$  for SR within the terminal inversion and intervening collinear regions.

**A**

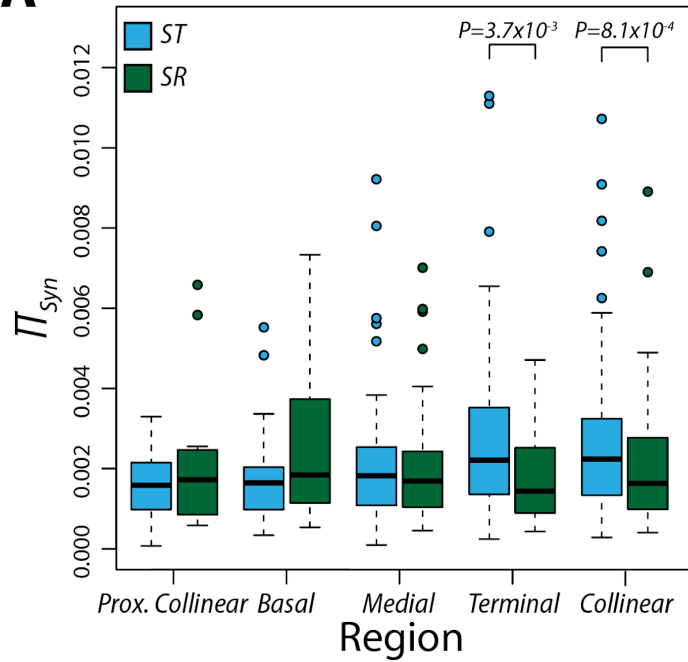

**B**

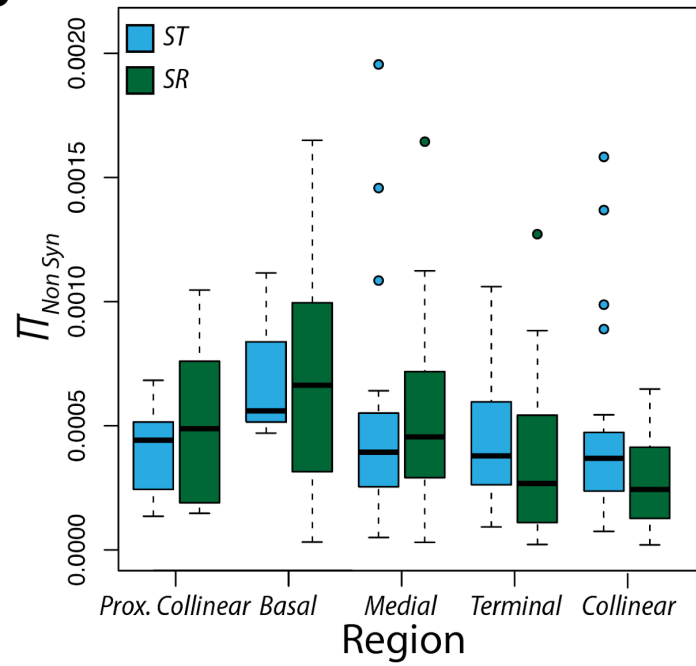

**Figure S5:** Structure of genetic variation on the autosomes in the RNA-seq data. A principal components analysis (PCA) was performed on genotypes called in all autosomal transcripts. The samples strongly cluster by *ST/SR* X-chromosome status, suggesting the presence of structured genetic variation present on the autosomes introduced by the crossing scheme used to generate the strains. As a result, only X-chromosome transcripts are analyzed further for differential expression.

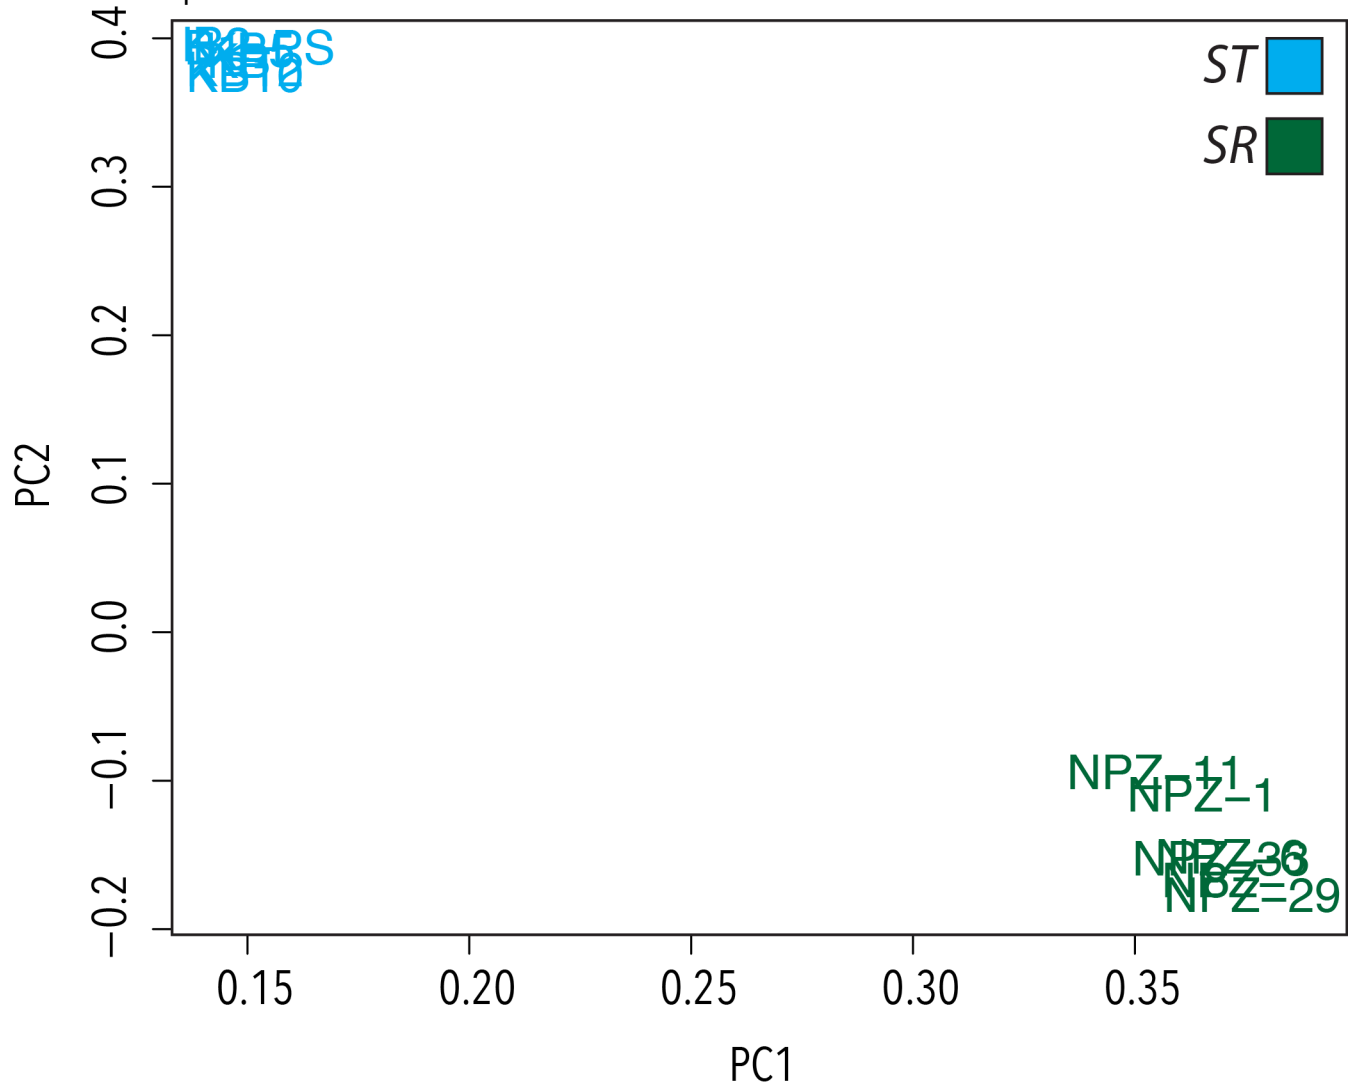

**Figure S6:** Diagram of the drive-selection balance model. The frequencies of the recombinant chromosomes are modeled in gametic and genotypic stages (both pre and post selection). Because *SR* is X-linked the irregular transmission between male and female gametic pool must also be incorporated. Finally, the sex-specific effects of drive (males only) and recombination (females only) are modeled. Given this model of allele frequency change, decay of linkage disequilibrium can be calculated in the traditional manner.

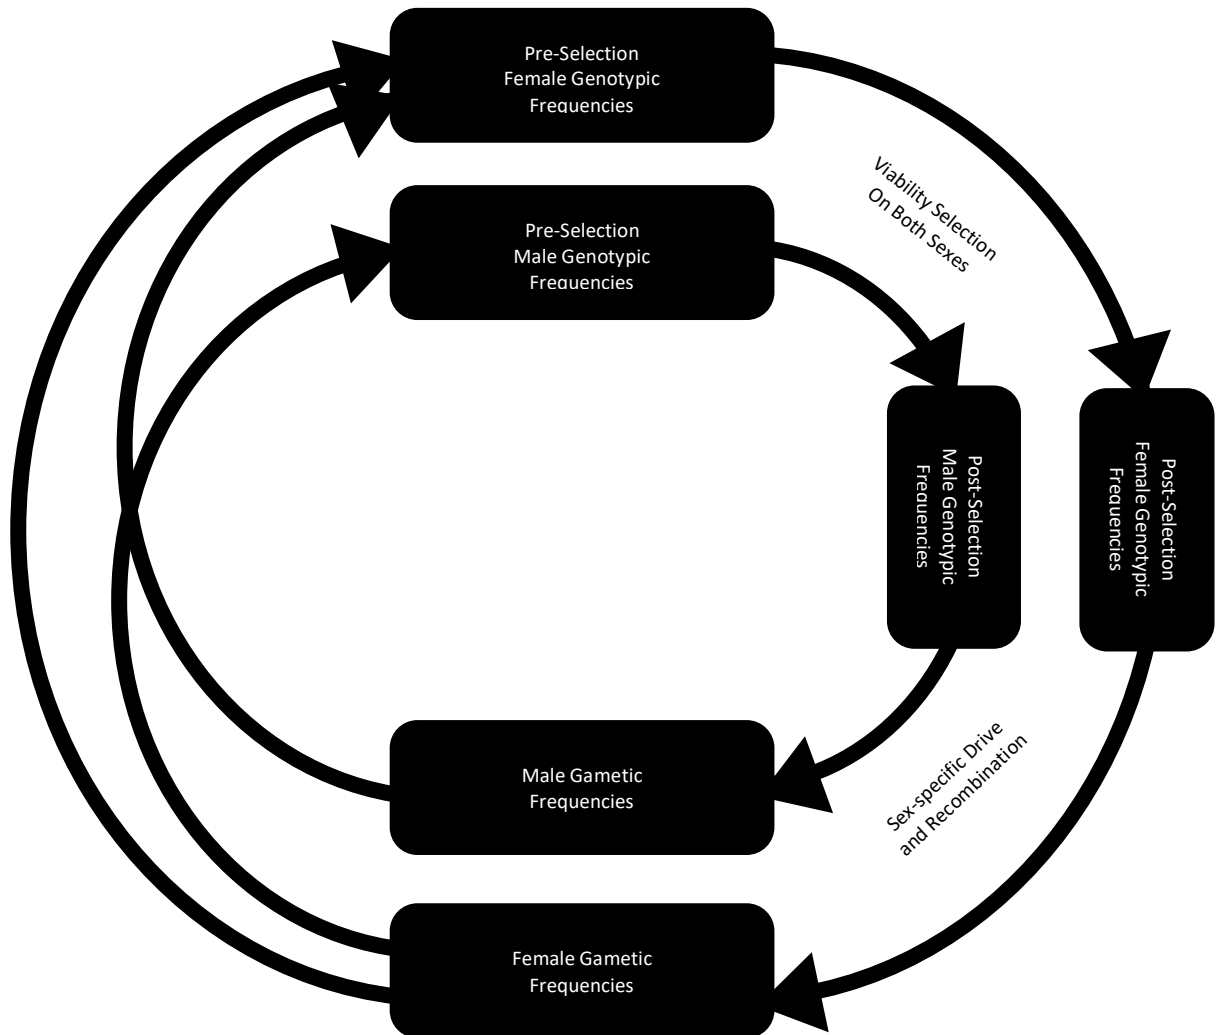

**Figure S7:** Polytene chromosomes of recombinant *SR* chromosomes in the heterozygous state with the standard arrangement. The terminal inversion only is depicted in panel A with traces of homologous strands in panel B. The basal and medial inversion carrying recombinant is depicted in panel C with traces of homologous strands in panel D.

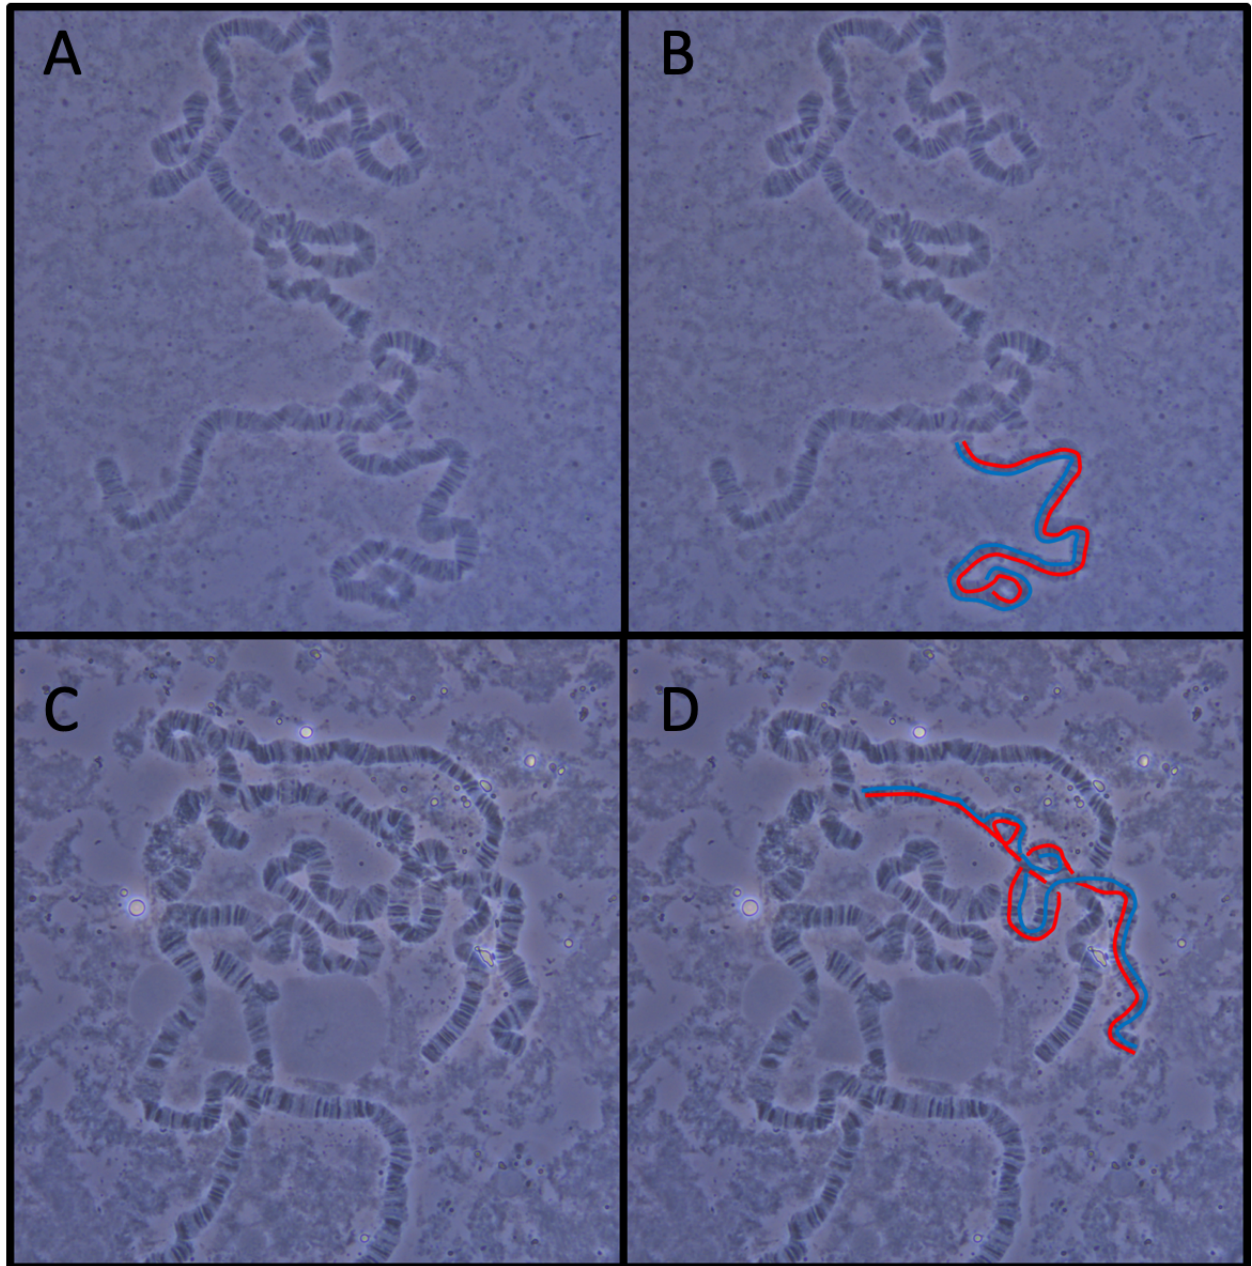

## Literature Cited

- Beckenbach, A. T. (1996). Selection and the "Sex-Ratio" polymorphism in natural populations of *Drosophila pseudoobscura*. *Evolution*, 50, 787-794.
- Crow J. F., and M. Kimura, 1970 *An introduction to population genetics theory*. Harper & Row.
- Ewens W. J., 2004 *Mathematical Population Genetics 1: Theoretical Introduction*. Springer Science & Business Media.
- Foss, E., Lande, R., Stahl, F. W., & Steinberg, C. M. (1993). Chiasma interference as a function of genetic distance. *Genetics*, 133(3), 681-691.
- Hilliker, A. J., Harauz, G., Reaume, A. G., Gray, M., Clark, S. H., & Chovnick, A. (1994). Meiotic gene conversion tract length distribution within the *rosy* locus of *Drosophila melanogaster*. *Genetics*, 137(4), 1019-1026.
- Navarro, A., Betrán, E., Barbadilla, A., & Ruiz, A. (1997). Recombination and gene flux caused by gene conversion and crossing over in inversion heterokaryotypes. *Genetics*, 146, 695-709.
- Nielsen R., and M. Slatkin, 2013 *An Introduction to Population Genetics: Theory and Applications*. Sinauer.
- Painter, T. S. (1934). A new method for the study of chromosomal aberrations and the plotting of chromosomal maps in *Drosophila melanogaster*. *Genetics*, 19, 175-188.
- Wallace, B. (1948). Studies on "sex ratio" in *Drosophila pseudoobscura*. I Selection and "sex ratio". *Evolution*, 2, 189-217.
